# Supplementary material for: Development of dairy beverages functionalized with pure ergosterol and mycosterol extracts: an alternative to phytosterol-based beverages
Source: Royal Society of Chemistry journal article supplement (doi:10.1039/c6fo01600f), 2016-12-13
Supplement: c6fo01600f1.pdf [file c6fo01600f1.pdf]

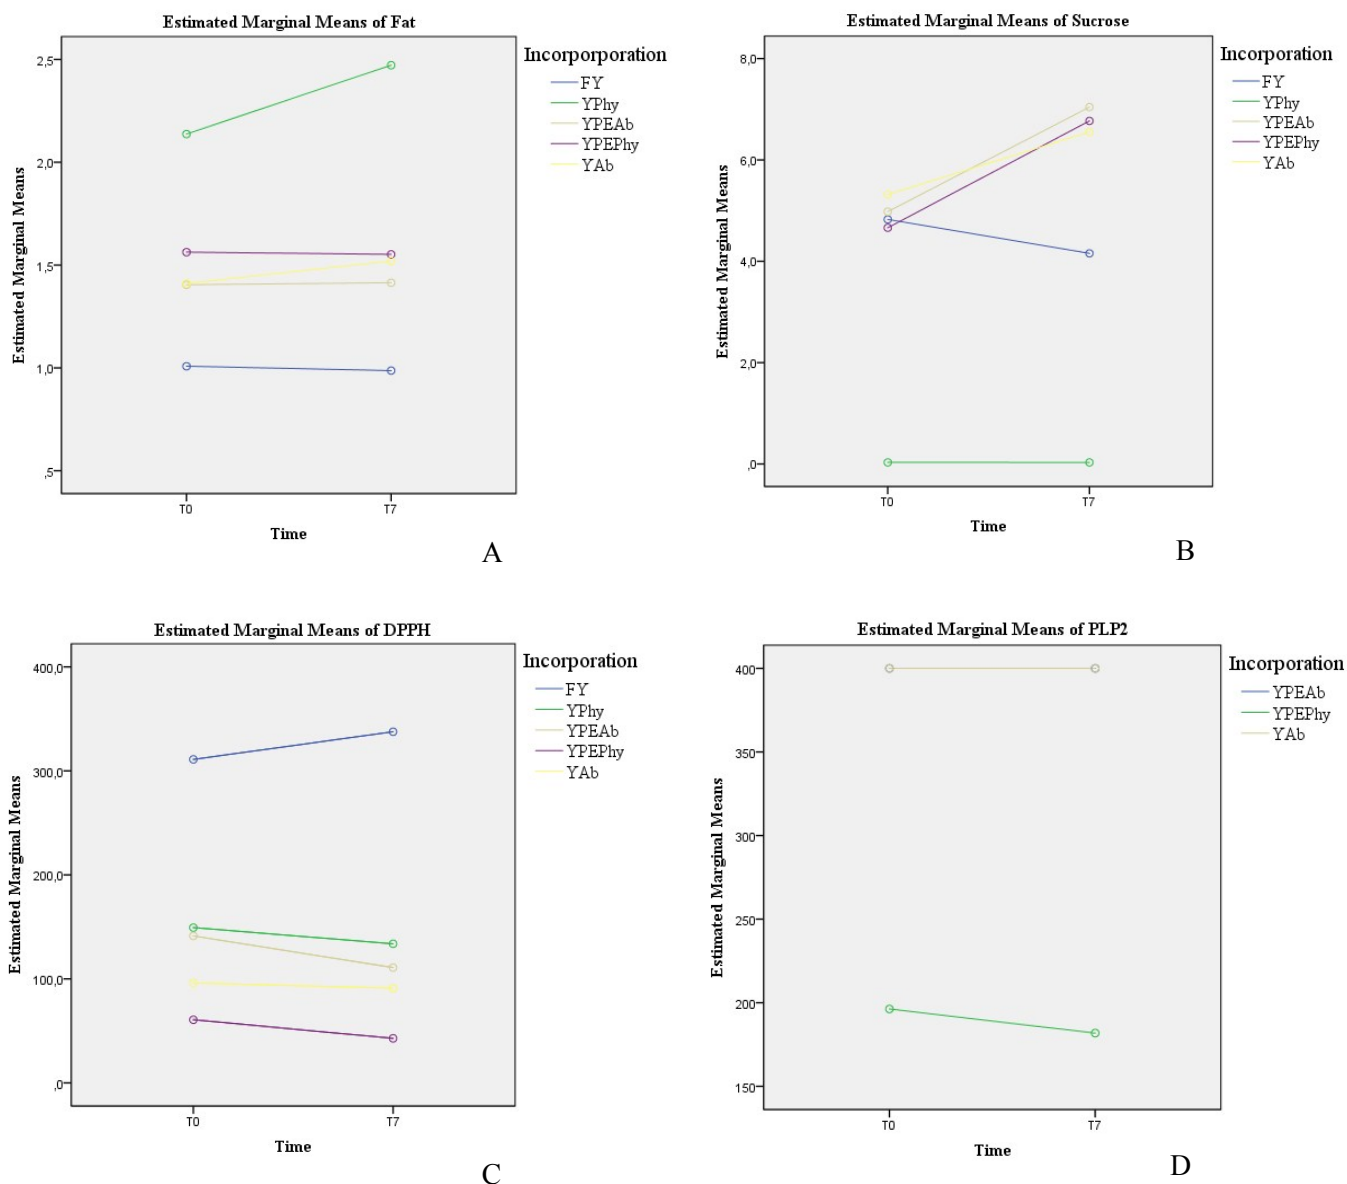

**Supplementary material 1.** Representation of the estimated marginal means for the various performed assays.
